# Supplementary material for: An insight into the mechanism of antibacterial activity by magnesium oxide nanoparticles
Source: Royal Society of Chemistry journal article supplement (doi:10.1039/d1tb00875g), 2021-01-01
Supplement: d1tb00875g1.pdf [file d1tb00875g1.pdf]

Table S1 The value of electronegativity of different elements in metal oxides

| Name of compound  | Difference in Electronegativity ( $\delta E$ ) | Remarks                                            |
|-------------------|------------------------------------------------|----------------------------------------------------|
| MgO               | $3.44-1.31 = 2.13$                             | If $\delta E > 2.0$ , the bond is considered ionic |
| CuO               | $3.44-1.65 = 1.79$                             |                                                    |
| ZnO               | $3.44-1.9 = 1.54$                              |                                                    |
| MnO <sub>2</sub>  | $3.44-1.55 = 1.89$                             |                                                    |
| Ag <sub>2</sub> O | $3.44-1.93 = 1.51$                             |                                                    |
| TiO <sub>2</sub>  | $3.44- 1.54 = 1.9$                             |                                                    |

Table S2 The value of parameters of the Weibull model fit in the magnesium ion release from magnesium oxide nanoparticle

| Parameter | Value   |
|-----------|---------|
| Td        | 3.20367 |
| b         | 1.33852 |
